# Supplementary material for: Change in Winter Precipitation Regime across Ontario, Canada
Source: MDPI journal article supplement (doi:10.3390/hydrology9050081), 2022-05-10
Supplement: s1 [file s1]

## **Supplementary Data**

**Table S1.** Alexandersson's Standard Normal Homogeneity Test (SNHT) statistics for all stations.

| Station       | Variable                              | No. of readings<br>(n) | SNHT standard Normal Homogeneity test |         |         |         |
|---------------|---------------------------------------|------------------------|---------------------------------------|---------|---------|---------|
|               |                                       |                        | t                                     | p-value | $\mu_1$ | $\mu_2$ |
| Ottawa        | Winter Mean Max daily Temp (°C)       | 117                    | 1997                                  | <0.0001 | 0.234   | 2.267   |
|               | Winter Mean Min daily Temp (°C)       |                        | 1947                                  | 0       | -9.593  | -7.715  |
|               | Winter Total daily Rainfall (mm)      |                        | 1918                                  | 0.001   | 162.669 | 215.34  |
|               | Winter Total daily Snowfall (cm)      |                        | 1927                                  | 0.001   | 234.913 | 190.313 |
|               | Winter Total daily Precipitation (mm) |                        |                                       | 0.214   | 396.957 |         |
| Brockville    | Winter Mean Max daily Temp (°C)       | 41                     | 1997                                  | 0.002   | 1.948   | 3.669   |
|               | Winter Mean Min daily Temp (°C)       |                        | 1997                                  | 0.027   | -6.238  | -4.637  |
|               | Winter Total daily Rainfall (mm)      |                        |                                       | 0.144   | 270.893 |         |
|               | Winter Total daily Snowfall (cm)      |                        | 1978                                  | 0.02    | 240.9   | 176.536 |
|               | Winter Total daily Precipitation (mm) |                        |                                       | 0.421   | 466.439 |         |
| Kingston      | Winter Mean Max daily Temp (°C)       | 29                     |                                       | 0.094   | 3.208   |         |
|               | Winter Mean Min daily Temp (°C)       |                        |                                       | 0.31    | -5.104  |         |
|               | Winter Total daily Rainfall (mm)      |                        |                                       | 0.498   | 316.855 |         |
|               | Winter Total daily Snowfall (cm)      |                        |                                       | 0.317   | 159.721 |         |
|               | Winter Total daily Precipitation (mm) |                        |                                       | 0.831   | 476.576 |         |
| North Bay     | Winter Mean Max daily Temp (°C)       | 69                     | 1997                                  | 0.01    | -1.516  | -0.227  |
|               | Winter Mean Min daily Temp (°C)       |                        | 1997                                  | 0.027   | -10.824 | -9.408  |
|               | Winter Total daily Rainfall (mm)      |                        | 1978                                  | 0.015   | 162.2   | 209.79  |
|               | Winter Total daily Snowfall (cm)      |                        | 2001                                  | 0.002   | 272.542 | 363.457 |
|               | Winter Total daily Precipitation (mm) |                        | 2000                                  | 0.007   | 423.246 | 518.975 |
| Kenora        | Winter Mean Max daily Temp (°C)       | 70                     | 1997                                  | 0.015   | -4.425  | -2.624  |
|               | Winter Mean Min daily Temp (°C)       |                        | 1997                                  | 0.009   | -13.617 | -11.473 |
|               | Winter Total daily Rainfall (mm)      |                        |                                       | 0.094   | 39.894  |         |
|               | Winter Total daily Snowfall (cm)      |                        | 1972                                  | 0.015   | 181.956 | 144.336 |
|               | Winter Total daily Precipitation (mm) |                        | 1966                                  | 0.003   | 215.539 | 174.279 |
| Sioux Lookout | Winter Mean Max daily Temp (°C)       | 70                     | 1997                                  | 0.018   | -4.189  | -3.097  |
|               | Winter Mean Min daily Temp (°C)       |                        | 1997                                  | 0.016   | -15.406 | -13.356 |
|               | Winter Total daily Rainfall (mm)      |                        |                                       | 0.104   | 39.85   |         |
|               | Winter Total daily Snowfall (cm)      |                        |                                       | 0.28    | 195.94  |         |
| Thunder Bay   | Winter Total daily Precipitation (mm) | 51                     |                                       | 0.503   | 229.526 |         |
|               | Winter Mean Max daily Temp (°C)       |                        |                                       | 0.572   | -1.703  |         |

| Station         | Variable                              | No. of readings (n) | SNHT standard Normal Homogeneity test |         |         |         |
|-----------------|---------------------------------------|---------------------|---------------------------------------|---------|---------|---------|
|                 |                                       |                     | t                                     | p-value | $\mu_1$ | $\mu_2$ |
| Fergus          | Winter Mean Min daily Temp (°C)       | 67                  |                                       | 0.793   | 13.136  |         |
|                 | Winter Total daily Rainfall (mm)      |                     |                                       | 0.902   | 85.398  |         |
|                 | Winter Total daily Snowfall (cm)      |                     |                                       | 0.121   | 200.288 |         |
|                 | Winter Total daily Precipitation (mm) |                     | 1956                                  | 0.001   | 326.733 | 234.019 |
|                 | Winter Mean Max daily Temp (°C)       |                     | 1997                                  | 0       | 1.106   | 2.973   |
|                 | Winter Mean Min daily Temp (°C)       |                     | 1980                                  | <0.0001 | -7.555  | -5.921  |
|                 | Winter Total daily Rainfall (mm)      |                     |                                       | 0.101   | 252.673 |         |
|                 | Winter Total daily Snowfall (cm)      |                     |                                       | 0.09    | 166.122 |         |
|                 | Winter Total daily Precipitation (mm) |                     |                                       | 0.712   | 417.088 |         |
|                 | Winter Mean Max daily Temp (°C)       |                     | 1997                                  | 0.007   | 3.086   | 4.945   |
| London          | Winter Mean Min daily Temp (°C)       | 61                  | 1997                                  | 0.044   | -5.234  | -3.46   |
|                 | Winter Total daily Rainfall (mm)      |                     |                                       | 0.224   | 293.52  |         |
|                 | Winter Total daily Snowfall (cm)      |                     |                                       | 0.498   | 198.043 |         |
|                 | Winter Total daily Precipitation (mm) |                     |                                       | 0.255   | 468.144 |         |
|                 | Winter Mean Max daily Temp (°C)       |                     | 1997                                  | 0.027   | 2.398   | 3.72    |
| Owen            | Winter Mean Min daily Temp (°C)       | 42                  | 1982                                  | 0.005   | -5.61   | -4.213  |
|                 | Winter Total daily Rainfall (mm)      |                     | 1978                                  | 0.013   | 200.707 | 273.182 |
|                 | Winter Total daily Snowfall (cm)      |                     |                                       | 0.961   | 333.145 |         |
|                 | Winter Total daily Precipitation (mm) |                     |                                       | 0.067   | 579.636 |         |
|                 | Winter Mean Max daily Temp (°C)       |                     | 1997                                  | 0       | 1.925   | 3.87    |
| Stratford       | Winter Mean Min daily Temp (°C)       | 47                  | 1989                                  | 0.001   | -5.783  | -4.186  |
|                 | Winter Total daily Rainfall (mm)      |                     | 1964                                  | 0.015   | 204.48  | 303.917 |
|                 | Winter Total daily Snowfall (cm)      |                     |                                       | 0.112   | 237.413 |         |
|                 | Winter Total daily Precipitation (mm) |                     | 1964                                  | 0.021   | 393.42  | 546.774 |
|                 | Winter Mean Max daily Temp (°C)       |                     | 1997                                  | 0.001   | 3.152   | 4.622   |
| Toronto Pearson | Winter Mean Min daily Temp (°C)       | 69                  | 1997                                  | 0       | -5.5    | -3.601  |
|                 | Winter Total daily Rainfall (mm)      |                     |                                       | 0.116   | 234.007 |         |
|                 | Winter Total daily Snowfall (cm)      |                     |                                       | 0.072   | 124.086 |         |

**Table S2.** Trend slopes for precipitation, rainfall and snowfall over winter period.

| Station         | Linear Regression Trend Slopes, mm/yr |                 |                      |                                                        |
|-----------------|---------------------------------------|-----------------|----------------------|--------------------------------------------------------|
|                 | Winter Rainfall                       | Winter Snowfall | Winter Precipitation | Sum of Winter Rainfall and Winter Snowfall Trend slope |
| Sioux Lookout   | 0.32                                  | -0.30           | -0.11                | 0.02                                                   |
| Kenora          | 0.18                                  | -0.62           | -0.66                | -0.44                                                  |
| Thunder Bay     | 0.12                                  | -1.26           | -2.11                | -1.14                                                  |
| North Bay       | 0.97                                  | 0.30            | 0.04                 | 1.27                                                   |
| Ottawa          | 0.67                                  | -0.52           | 0.08                 | 0.15                                                   |
| Brockville      | 1.29                                  | -1.76           | -0.44                | -0.47                                                  |
| Owen Sound      | 2.71                                  | 0.05            | 2.77                 | 2.76                                                   |
| Kingston        | -0.55                                 | -0.63           | -1.17                | -1.17                                                  |
| Fergus          | 0.97                                  | -0.75           | 0.28                 | 0.22                                                   |
| Toronto Pearson | 0.67                                  | -0.40           | 0.19                 | 0.27                                                   |
| Stratford       | 1.36                                  | -0.90           | 0.45                 | 0.46                                                   |
| London          | 0.87                                  | 0.08            | 0.23                 | 0.95                                                   |
| Windsor         | 0.90                                  | 0.68            | 1.21                 | 1.58                                                   |

**Table S3.** Temporal trend analysis for winter daily minimum mean temperature for all stations.

| Station         | <u>Linear regression</u> |          | Z Rank Mann-Kendal | Trend |
|-----------------|--------------------------|----------|--------------------|-------|
|                 | Slope (C°/yr)            | R-square |                    |       |
| Sioux Lookout   | 0.02                     | 0.04     | 0.70               | I*    |
| Kenora          | 0.02                     | 0.07     | 1.57               | I*    |
| Thunder Bay     | 0.002                    | 0.00     | -0.46              | I*    |
| North Bay       | 0.02                     | 0.06     | 1.18               | I*    |
| Ottawa          | 0.04                     | 0.24     | 3.87               | I†    |
| Brockville      | 0.05                     | 0.21     | 2.10               | I†    |
| Owen Sound      | 0.05                     | 0.22     | 2.40               | I†    |
| Kingston        | -0.003                   | 0.001    | -0.38              | D*    |
| Fergus          | 0.04                     | 0.28     | 3.75               | I†    |
| Toronto Pearson | 0.02                     | 0.14     | 2.54               | I†    |
| Stratford       | 0.05                     | 0.31     | 3.21               | I†    |
| London          | 0.01                     | 0.01     | 0.12               | I*    |
| Windsor         | 0.02                     | 0.08     | 1.43               | I*    |

D=Decreasing, I=Increasing; \*=Non-Significant; †=Significant

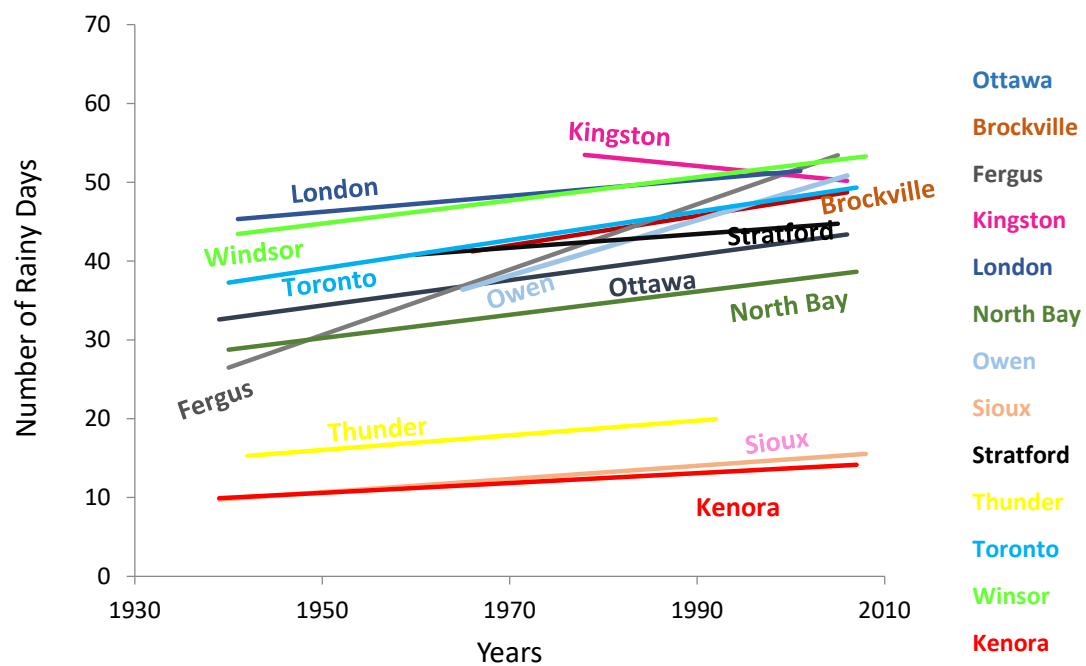

**Figure S1.** Linear regression of number of rainy days versus years for all stations across Ontario.
